# Supplementary material for: Predicting the connectivity of primate cortical networks from topological and spatial node properties
Source: Springer Nature journal article supplement (doi:10.1186/1752-0509-1-16), 2007-03-08

Comm. 1, node degree

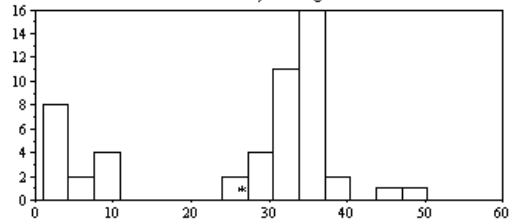

Comm. 1, clust. coeff.

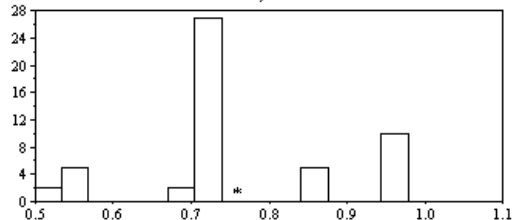

Comm. 1, av. sh. path. dist.

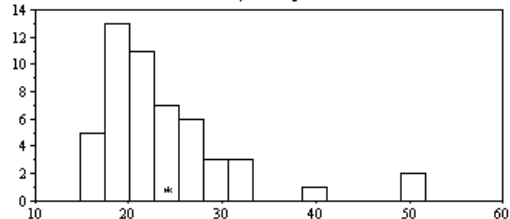

Comm. 1, match. ind.

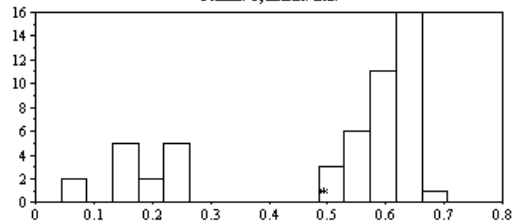

Comm. 2, node degree

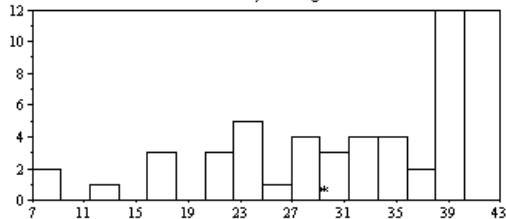

Comm. 2, clust. coeff.

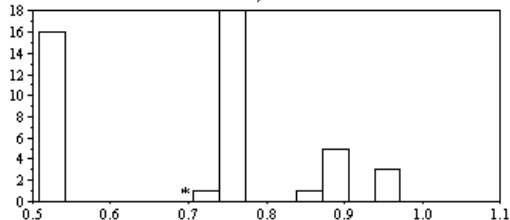

Comm. 2, av. sh. path. dist.

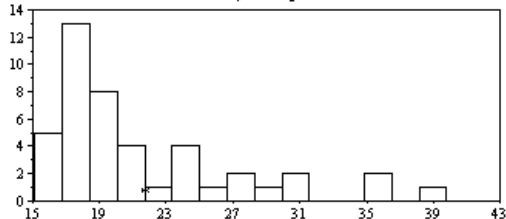

Comm. 2, match. ind.

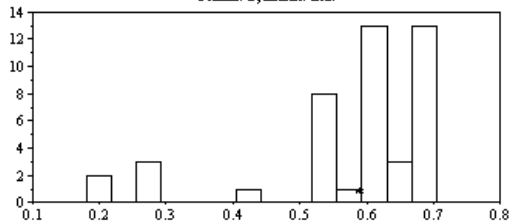

Supplement: 12918_2006_16_MOESM5_ESM.pdf [file 12918_2006_16_MOESM5_ESM.pdf]
