# Supplementary material for: Predicting the connectivity of primate cortical networks from topological and spatial node properties
Source: Springer Nature journal article supplement (doi:10.1186/1752-0509-1-16), 2007-03-08

Comm. 1, local density

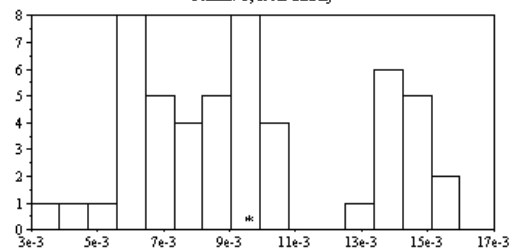

Comm. 2, local density

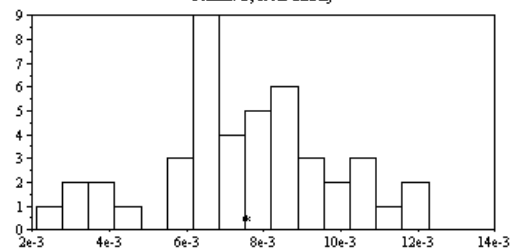

Comm. 1, coeff. var. near. dist.

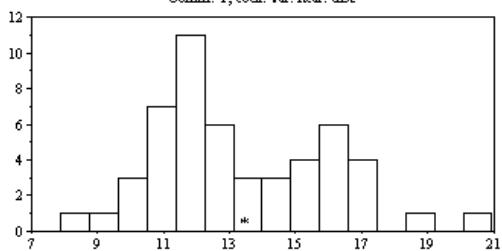

Comm. 2, coeff. var. near. dist.

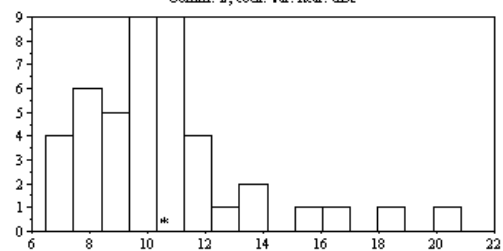

Comm. 1, area

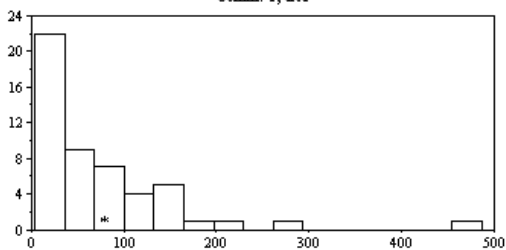

Comm. 2, area

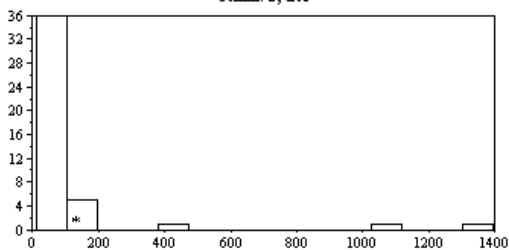

Supplement: 12918_2006_16_MOESM6_ESM.pdf [file 12918_2006_16_MOESM6_ESM.pdf]
