# Supplementary material for: Predicting the connectivity of primate cortical networks from topological and spatial node properties
Source: Springer Nature journal article supplement (doi:10.1186/1752-0509-1-16), 2007-03-08
Supplement: 12918_2006_16_MOESM7_ESM.pdf [file 12918_2006_16_MOESM7_ESM.pdf]

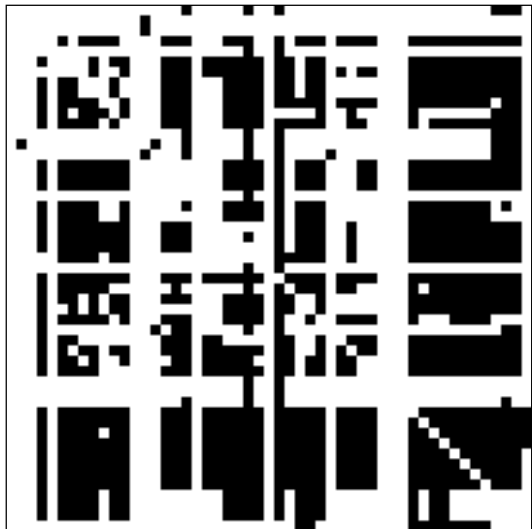

(a)

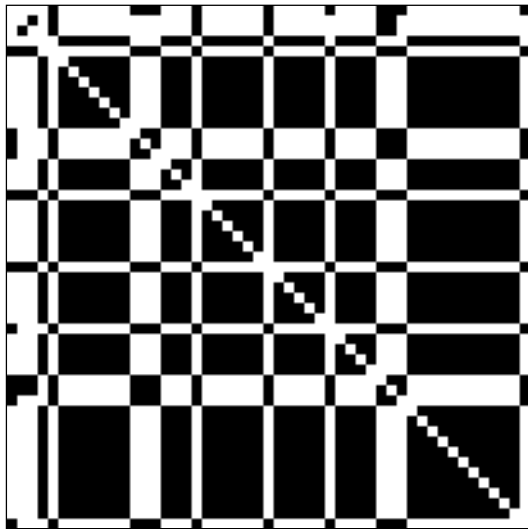

(c)

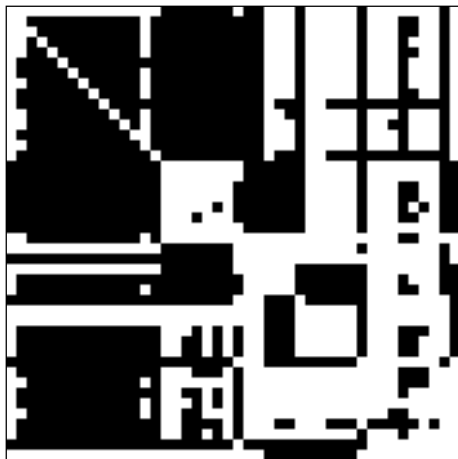

(b)

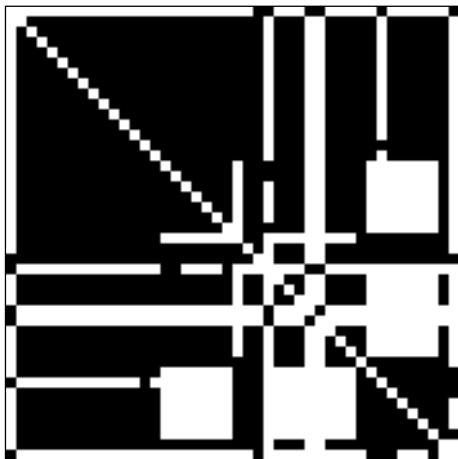

(d)
