# Supplementary material for: Predicting the connectivity of primate cortical networks from topological and spatial node properties
Source: Springer Nature journal article supplement (doi:10.1186/1752-0509-1-16), 2007-03-08
Supplement: 12918_2006_16_MOESM9_ESM.pdf [file 12918_2006_16_MOESM9_ESM.pdf]

|      | V1 | V2 | V3 | PIP | V3A | V4 | PO | MT | V4t | DP | VOT | LIP | VIP | MIP | MDP | MSTd | MSTI | PITd | PITv | 7a | STPp | CITd | CITv | STPa | AITv | FEF | TF | 46 | FST | TH | AITd |   |
|------|----|----|----|-----|-----|----|----|----|-----|----|-----|-----|-----|-----|-----|------|------|------|------|----|------|------|------|------|------|-----|----|----|-----|----|------|---|
| V1   |    | 0  | 0  | 0   | 0   | 1  | 0  | 0  | 0   | 0  | 0   | 0   | 0   | 0   | 0   | 0    | 0    | 1    | 1    | 1  | 1    | 1    | 1    | 1    | 0    | 1   | 1  | 0  | 1   | 1  |      |   |
| V2   | 0  |    | 1  | 0   | 1   | 1  | 1  | 1  | 1   | 1  | 0   | 1   | 1   | 0   | 0   | 1    | 1    | 0    | 1    | 1  | 1    | 1    | 0    | 1    | 0    | 1   | 1  | 1  | 1   | 0  | 0    |   |
| V3   | 0  | 1  |    | 0   | 1   | 1  | 1  | 1  | 1   | 1  | 0   | 1   | 1   | 0   | 0   | 1    | 1    | 0    | 1    | 1  | 1    | 0    | 0    | 0    | 0    | 1   | 1  | 1  | 1   | 0  | 0    |   |
| PIP  | 0  | 0  | 0  |     | 0   | 0  | 0  | 0  | 0   | 0  | 0   | 0   | 0   | 0   | 0   | 0    | 0    | 0    | 0    | 0  | 0    | 0    | 0    | 0    | 0    | 0   | 0  | 0  | 0   | 0  | 0    |   |
| V3A  | 0  | 1  | 1  | 0   |     | 1  | 0  | 1  | 1   | 1  | 0   | 1   | 1   | 0   | 0   | 1    | 1    | 0    | 1    | 1  | 0    | 0    | 0    | 0    | 0    | 1   | 1  | 1  | 1   | 0  | 0    |   |
| V4   | 1  | 1  | 1  | 0   | 1   |    | 0  | 1  | 1   | 1  | 0   | 1   | 1   | 0   | 0   | 1    | 1    | 1    | 1    | 1  | 1    | 1    | 1    | 0    | 0    | 1   | 1  | 1  | 0   | 1  | 1    |   |
| PO   | 0  | 1  | 1  | 0   | 0   | 0  |    | 0  | 1   | 1  | 0   | 0   | 1   | 0   | 0   | 0    | 1    | 0    | 0    | 0  | 0    | 0    | 0    | 0    | 0    | 0   | 0  | 0  | 0   | 1  | 0    | 0 |
| MT   | 0  | 1  | 1  | 0   | 1   | 1  | 0  |    | 1   | 1  | 0   | 1   | 1   | 0   | 0   | 1    | 1    | 0    | 0    | 0  | 0    | 0    | 0    | 0    | 0    | 1   | 0  | 1  | 1   | 1  | 0    | 0 |
| V4t  | 0  | 1  | 1  | 0   | 1   | 1  | 1  | 1  |     | 1  | 0   | 1   | 1   | 0   | 0   | 1    | 1    | 0    | 1    | 1  | 1    | 1    | 0    | 1    | 0    | 0   | 1  | 1  | 1   | 1  | 0    | 0 |
| DP   | 0  | 1  | 1  | 0   | 1   | 1  | 1  | 1  | 1   |    | 0   | 1   | 1   | 0   | 0   | 1    | 1    | 0    | 1    | 1  | 1    | 1    | 0    | 1    | 0    | 0   | 1  | 1  | 1   | 1  | 0    | 0 |
| VOT  | 0  | 0  | 0  | 0   | 0   | 0  | 0  | 0  | 0   | 0  |     | 0   | 0   | 0   | 0   | 0    | 0    | 0    | 0    | 0  | 0    | 0    | 0    | 0    | 0    | 0   | 0  | 0  | 0   | 0  | 0    | 0 |
| LIP  | 0  | 1  | 1  | 0   | 1   | 1  | 0  | 1  | 1   | 1  | 0   |     | 1   | 0   | 0   | 1    | 1    | 0    | 0    | 0  | 0    | 0    | 0    | 0    | 0    | 1   | 0  | 1  | 1   | 1  | 0    | 0 |
| VIP  | 0  | 1  | 1  | 0   | 1   | 1  | 1  | 1  | 1   | 1  | 0   | 1   |     | 0   | 0   | 1    | 1    | 0    | 1    | 1  | 1    | 1    | 0    | 1    | 0    | 0   | 1  | 1  | 1   | 1  | 0    | 0 |
| MIP  | 0  | 0  | 0  | 0   | 0   | 0  | 0  | 0  | 0   | 0  | 0   | 0   | 0   |     | 1   | 0    | 0    | 0    | 0    | 0  | 0    | 0    | 0    | 0    | 0    | 0   | 0  | 0  | 0   | 0  | 0    | 0 |
| MDP  | 0  | 0  | 0  | 0   | 0   | 0  | 0  | 0  | 0   | 0  | 0   | 0   | 0   | 0   |     | 0    | 0    | 0    | 0    | 0  | 0    | 0    | 0    | 0    | 0    | 0   | 0  | 0  | 0   | 0  | 0    | 0 |
| MSTd | 0  | 1  | 1  | 0   | 1   | 1  | 0  | 1  | 1   | 1  | 0   | 1   | 1   | 0   | 0   |      | 1    | 0    | 1    | 1  | 1    | 0    | 0    | 0    | 0    | 1   | 1  | 1  | 1   | 1  | 0    | 0 |
| MSTI | 0  | 1  | 1  | 0   | 1   | 1  | 1  | 1  | 1   | 1  | 0   | 1   | 1   | 0   | 0   | 1    |      | 0    | 1    | 1  | 1    | 1    | 0    | 1    | 0    | 0   | 1  | 1  | 1   | 1  | 0    | 1 |
| PITd | 1  | 0  | 0  | 0   | 0   | 1  | 0  | 0  | 0   | 0  | 0   | 0   | 0   | 0   | 0   | 0    |      | 0    | 1    | 1  | 1    | 1    | 1    | 1    | 1    | 0   | 1  | 1  | 0   | 1  | 1    |   |
| PITv | 1  | 1  | 1  | 0   | 1   | 1  | 0  | 0  | 1   | 1  | 0   | 0   | 1   | 0   | 0   | 1    | 1    |      | 1    | 1  | 1    | 1    | 1    | 0    | 0    | 0   | 1  | 1  | 0   | 1  | 1    |   |
| 7a   | 1  | 1  | 1  | 0   | 1   | 1  | 0  | 0  | 1   | 1  | 0   | 0   | 1   | 0   | 0   | 1    | 1    | 1    |      | 1  | 1    | 1    | 1    | 0    | 0    | 1   | 1  | 0  | 1   | 1  | 1    |   |
| STPp | 1  | 1  | 0  | 0   | 0   | 1  | 0  | 0  | 1   | 1  | 0   | 0   | 1   | 0   | 0   | 0    | 1    | 1    | 1    | 1  |      | 1    | 1    | 1    | 1    | 0   | 1  | 1  | 0   | 1  | 1    |   |
| CITd | 1  | 0  | 0  | 0   | 0   | 1  | 0  | 0  | 0   | 0  | 0   | 0   | 0   | 0   | 0   | 0    | 0    | 1    | 1    | 1  | 1    | 1    | 1    | 1    | 0    | 1   | 1  | 0  | 1   | 1  | 1    |   |
| CITv | 1  | 1  | 0  | 0   | 0   | 1  | 0  | 0  | 1   | 1  | 0   | 0   | 1   | 0   | 0   | 0    | 1    | 1    | 1    | 1  | 1    | 1    | 1    | 1    | 1    | 0   | 1  | 1  | 0   | 1  | 1    |   |
| STPa | 1  | 0  | 0  | 0   | 0   | 0  | 0  | 0  | 0   | 0  | 0   | 0   | 0   | 0   | 0   | 0    | 0    | 1    | 0    | 0  | 1    | 1    | 1    | 1    | 1    | 0   | 0  | 0  | 0   | 1  | 1    |   |
| AITv | 1  | 0  | 0  | 0   | 0   | 0  | 0  | 0  | 0   | 0  | 0   | 0   | 0   | 0   | 0   | 0    | 0    | 1    | 0    | 0  | 1    | 1    | 1    | 1    | 1    | 0   | 0  | 0  | 0   | 1  | 1    |   |
| FEF  | 0  | 1  | 1  | 0   | 1   | 1  | 0  | 1  | 1   | 1  | 0   | 1   | 1   | 0   | 0   | 1    | 1    | 0    | 0    | 0  | 0    | 0    | 0    | 0    | 0    | 1   | 1  | 0  | 0   | 0  | 0    |   |
| TF   | 1  | 1  | 1  | 0   | 1   | 1  | 0  | 0  | 1   | 1  | 0   | 0   | 1   | 0   | 0   | 1    | 1    | 1    | 1    | 1  | 1    | 1    | 1    | 1    | 0    | 0   | 1  | 1  | 1   | 0  | 1    | 1 |
| 46   | 1  | 1  | 1  | 0   | 1   | 1  | 0  | 1  | 1   | 1  | 0   | 1   | 1   | 0   | 0   | 1    | 1    | 1    | 1    | 1  | 1    | 1    | 1    | 0    | 0    | 1   | 1  | 1  | 1   | 0  | 1    | 1 |
| FST  | 0  | 1  | 1  | 0   | 1   | 0  | 1  | 1  | 1   | 1  | 0   | 1   | 1   | 0   | 0   | 1    | 1    | 0    | 0    | 0  | 0    | 0    | 0    | 0    | 0    | 0   | 0  | 0  | 0   | 0  | 0    | 0 |
| TH   | 1  | 0  | 0  | 0   | 0   | 1  | 0  | 0  | 0   | 0  | 0   | 0   | 0   | 0   | 0   | 0    | 0    | 1    | 1    | 1  | 1    | 1    | 1    | 1    | 1    | 0   | 1  | 1  | 0   | 1  | 1    |   |
| AITd | 1  | 0  | 0  | 0   | 0   | 1  | 0  | 0  | 0   | 0  | 0   | 0   | 0   | 0   | 0   | 0    | 1    | 1    | 1    | 1  | 1    | 1    | 1    | 1    | 1    | 0   | 1  | 1  | 0   | 1  | 1    |   |
